# Supplementary material for: Heteromeric HSFA2/HSFA3 complexes drive transcriptional memory after heat stress in Arabidopsis
Source: PubMed Central journal article supplement (PMC8187452; doi:10.1038/s41467-021-23786-6), 2021-06-08
Supplement: 41467_2021_23786_MOESM1_ESM.pdf [file 41467_2021_23786_MOESM1_ESM.pdf]

**Heteromeric HSFA2/HSFA3 complexes drive transcriptional memory after heat stress in *Arabidopsis***

Thomas Friedrich<sup>1</sup>, Vicky Oberkofler<sup>1</sup>, Inês Trindade<sup>1</sup>, Simone Altmann<sup>1+</sup>, Krzysztof Brzezinka<sup>1</sup>, Jörn Lämke<sup>1</sup>, Michal Gorka<sup>2</sup>, Christian Kappel<sup>1</sup>, Ewelina Sokolowska<sup>2</sup>, Aleksandra Skirycz<sup>2</sup>, Alexander Graf<sup>2</sup>, Isabel Bäurle<sup>1</sup>

**Supplementary Figures and Tables**

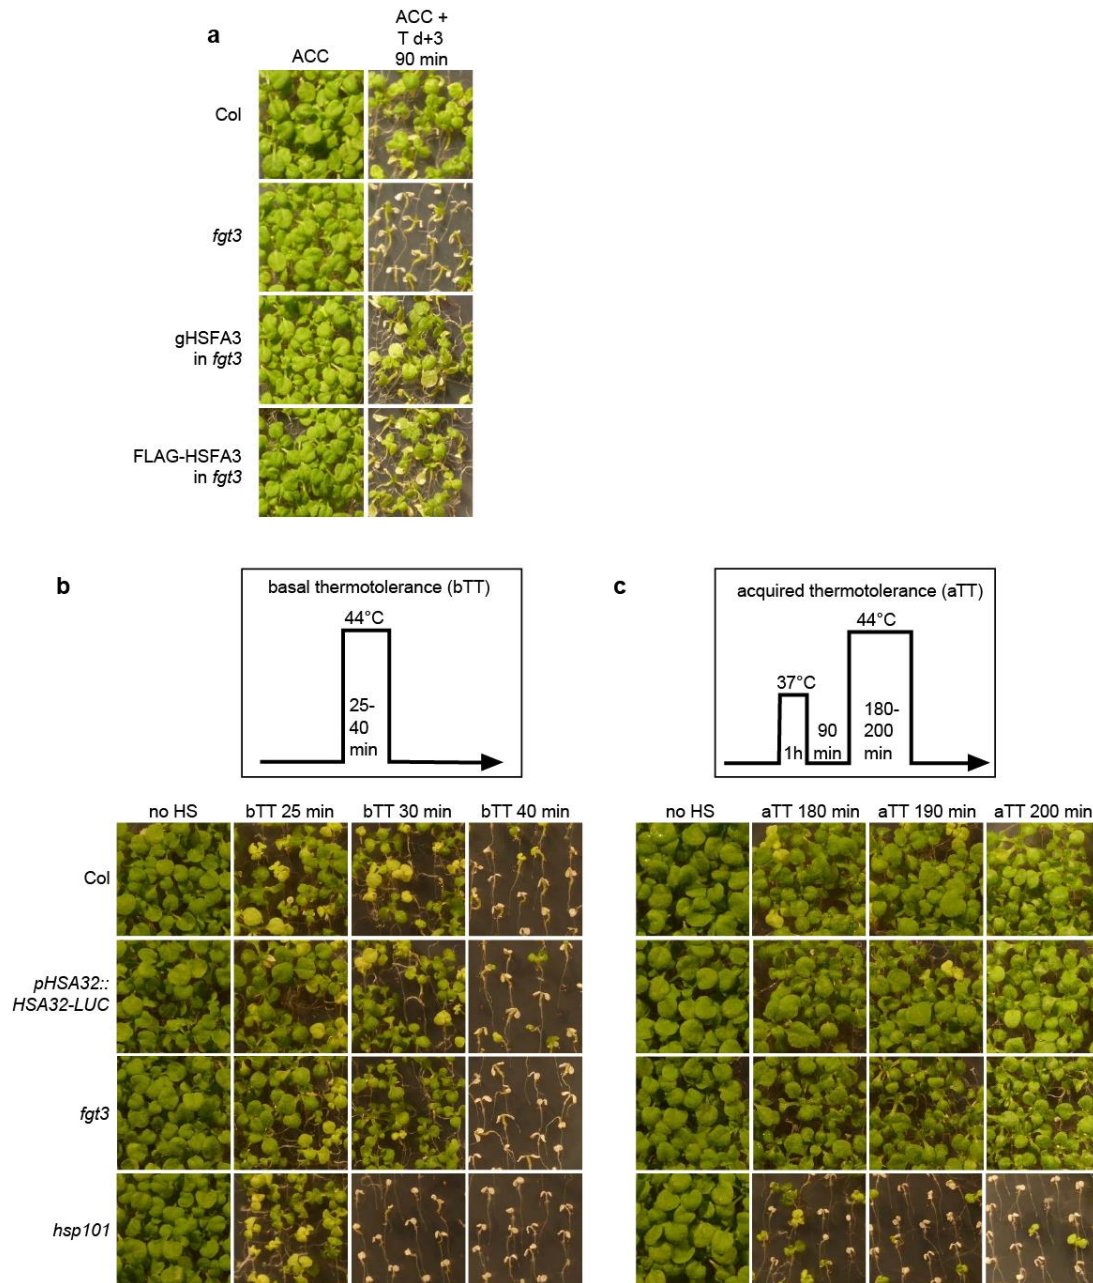

**Supplementary Fig. 1 FGT3 is required for HS memory, but not basal thermotolerance or acquired thermotolerance**

**a-c** Characterization of different HS responses in *fgt3* mutants.

**a** *fgt3* is defective in physiological HS memory. 4 d-old seedlings were exposed to an ACC treatment and exposed to a triggering HS (T) at 44°C for 90 min on d+3 after ACC (cf. Fig. 2a). The defect was complemented by transformation with a genomic *HSFA3* fragment (*gHSFA3*) or by *pHSFA3::FLAG-HSFA3* (*FLAG-HSFA3*). Images were taken 14 d after ACC.

**b** Basal thermotolerance is not affected in *fgt3* mutants. Treatment scheme for basal thermotolerance (bTT) assays (Stief et al., 2014). 4 d-old seedlings were exposed to 44°C for 25-40 min and images were taken 14 d later. The *hsp101* mutant is shown as a control for decreased basal thermotolerance.

**c** Acquired thermotolerance is not affected in *fgt3* mutants. Treatment scheme for acquired thermotolerance (aTT) assays (Stief et al., 2014). 4 d-old seedlings were exposed to 37°C for 1 h, recovered at 23°C for 90 min and subsequently exposed to 44°C for 180-200 min. Images were taken 14 d later. The *hsp101* mutant is shown as a control for decreased acquired thermotolerance.

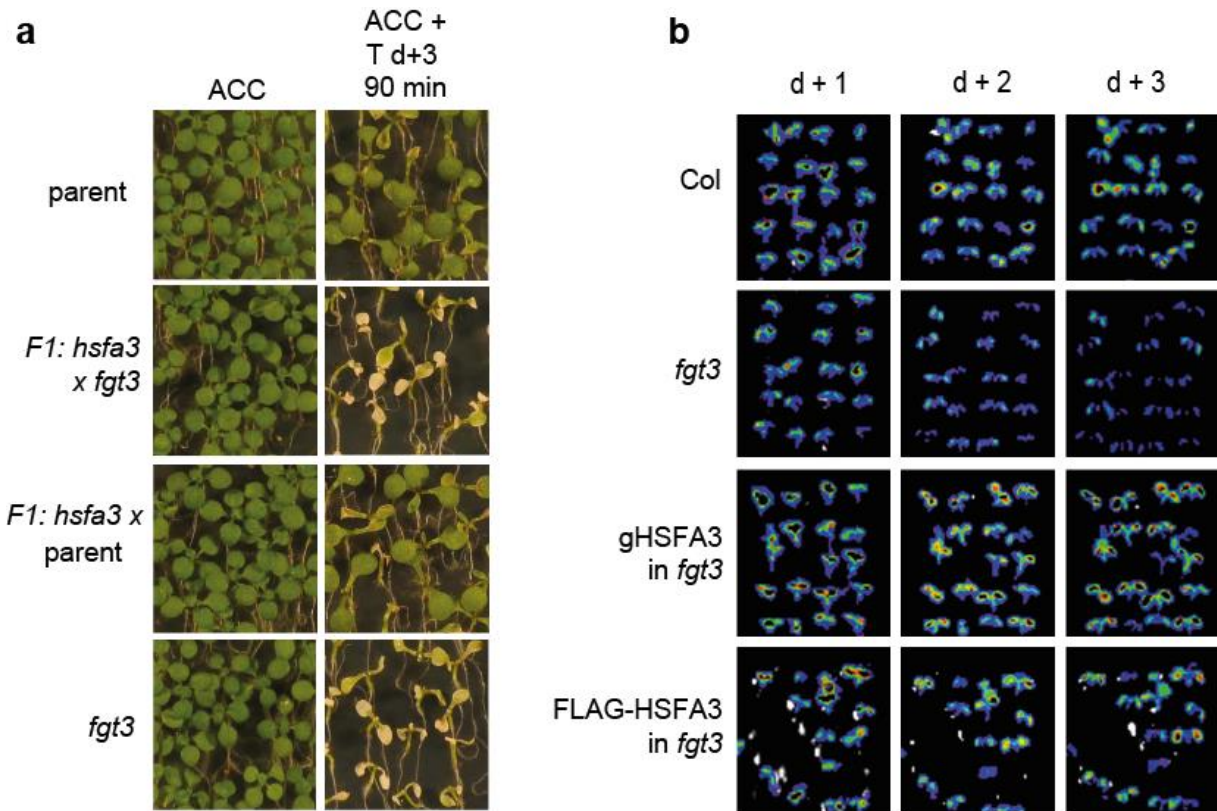

**Supplementary Fig. 2 FGT3 encodes HSFA3**

**a** Complementation crossing for *hsfa3-1* and *fgt3*; like *fgt3* mutants, the F1 progeny of *hsfa3-1* *x fgt3* showed decreased survival in HS memory assays compared to the parental *pHSA32::HSA32-LUC* line or the F1 progeny of *hsfa3-1* *x pHSA32::HSA32-LUC*. 4 d-old seedlings were exposed to an ACC treatment and then to a triggering HS (T) at 44°C for 90 min on d 3 after ACC (cf. Fig. 2a). Images were taken 14 d after ACC.

**b** *fgt3* mutants are complemented by either a genomic *HSFA3* fragment (*gHSFA3*) or a *pHSFA3::FLAG-HSFA3* construct (*FLAG-HSFA3*) in sustained induction of *HSA32-LUC* expression. 4 d-old seedlings were exposed to an ACC treatment and activity of *pHSA32::HSA32-LUC* was recorded for the 3 following days (cf. Fig. 1a).

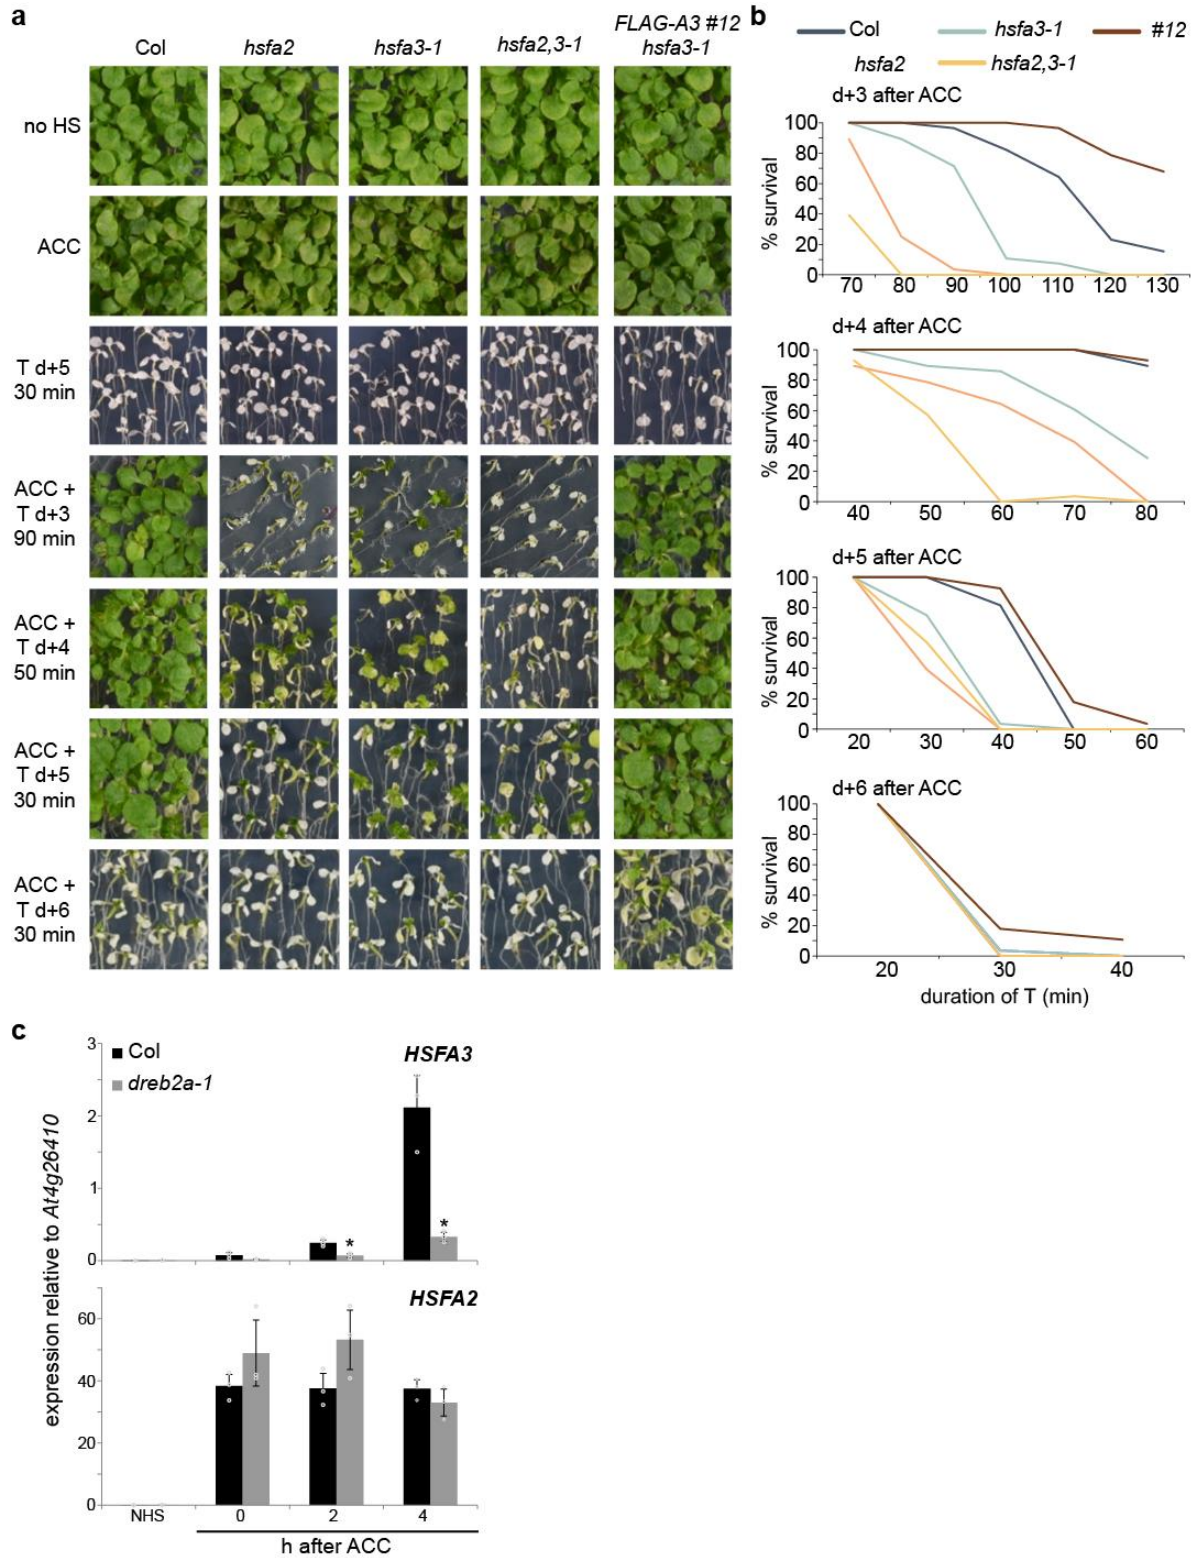

**Supplementary Fig. 3: Physiological HS memory lasts for 5 days and depends on *HSFA2* and *HSFA3***

Long term HS memory assay for *hsfa2*, *hsfa3-1*, *hsfa2 hsfa3-1* mutants and the native *FLAG-HSFA3* overexpressing line #12.

**a** Representative images of survival assays with plants exposed to triggering HS (T) of different durations on d +3, 4, 5 and 6 after ACC. Naïve plants were unable to survive a triggering HS of 30 min. Up to 5 d after ACC, primed plants survived triggering HS of 30 min or longer; by d 6 after ACC, HS memory was no longer detectable in Col.

**b** Percentage of survival of the genotypes tested in (a) across all tested time points on d +3, 4, 5, and 6 after ACC.

**c** *HSFA3* induction after ACC is reduced in *dreb2a-1* mutants. Transcript levels of *HSFA3* and *HSFA2* relative to *At4g26410* reference gene in Col and *dreb2a-1* mutants at the indicated time after ACC treatment or NHS as measured by qRT-PCR. Data are mean  $\pm$  SD of three independent experiments. Asterisks mark significant differences to Col (unpaired two-sided t-test,  $p < 0.01$ ).



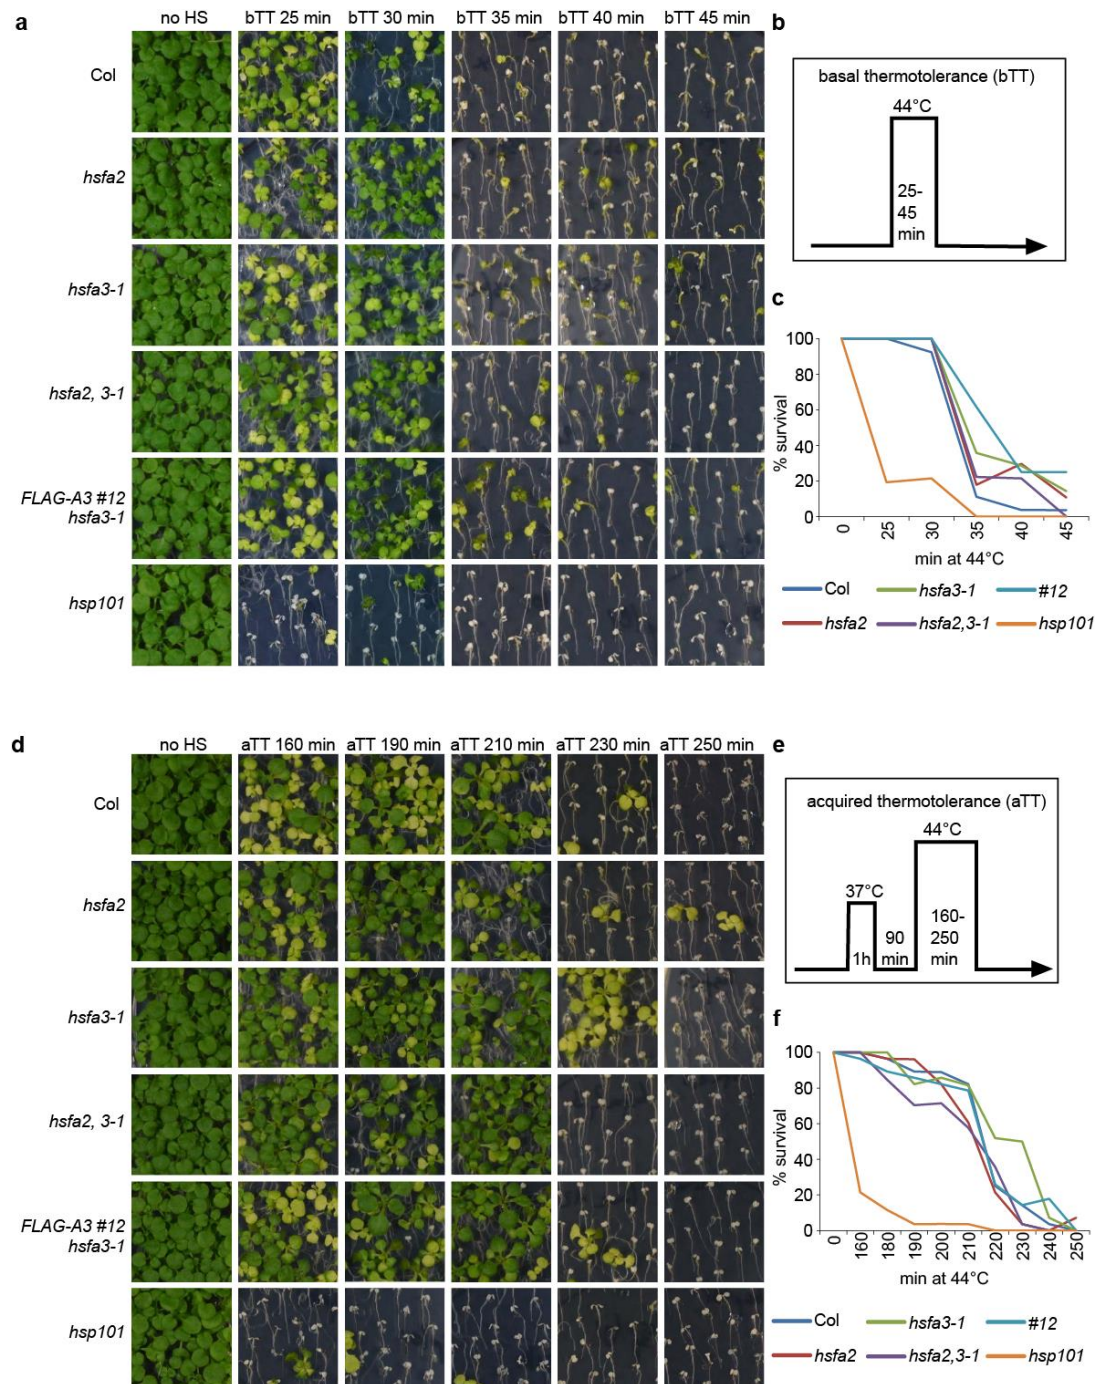

#### Supplementary Fig. 4: HSFA2 and HSFA3 are not required for basal or acquired thermotolerance

**a-c** Basal thermotolerance assay for *hsfa2*, *hsfa3*, *hsfa2 hsfa3-1* mutants and FLAG-HSFA3 native overexpressing line #12. **b** Treatment scheme for basal thermotolerance (bTT) assays: 4 d-old seedlings were exposed to 44°C for 25-45 min and survival was scored 14 d later. **c** Percentage of surviving plants after bTT assay.

**d-f** Acquired thermotolerance assay for *hsfa2*, *hsfa3*, *hsfa2 hsfa3-1* mutants and FLAG-HSFA3 native overexpressing line #12. **e** Treatment scheme for acquired thermotolerance (aTT) assays: 4 d-old seedlings were exposed to 37°C for 1 h, recovered at 23°C for 90 min and subsequently exposed to 44°C for 160-250 min. Survival was scored 14 d later. **f** Percentage of surviving plants after aTT assay. The *hsp101* mutant is shown as a control for decreased aTT and bTT.

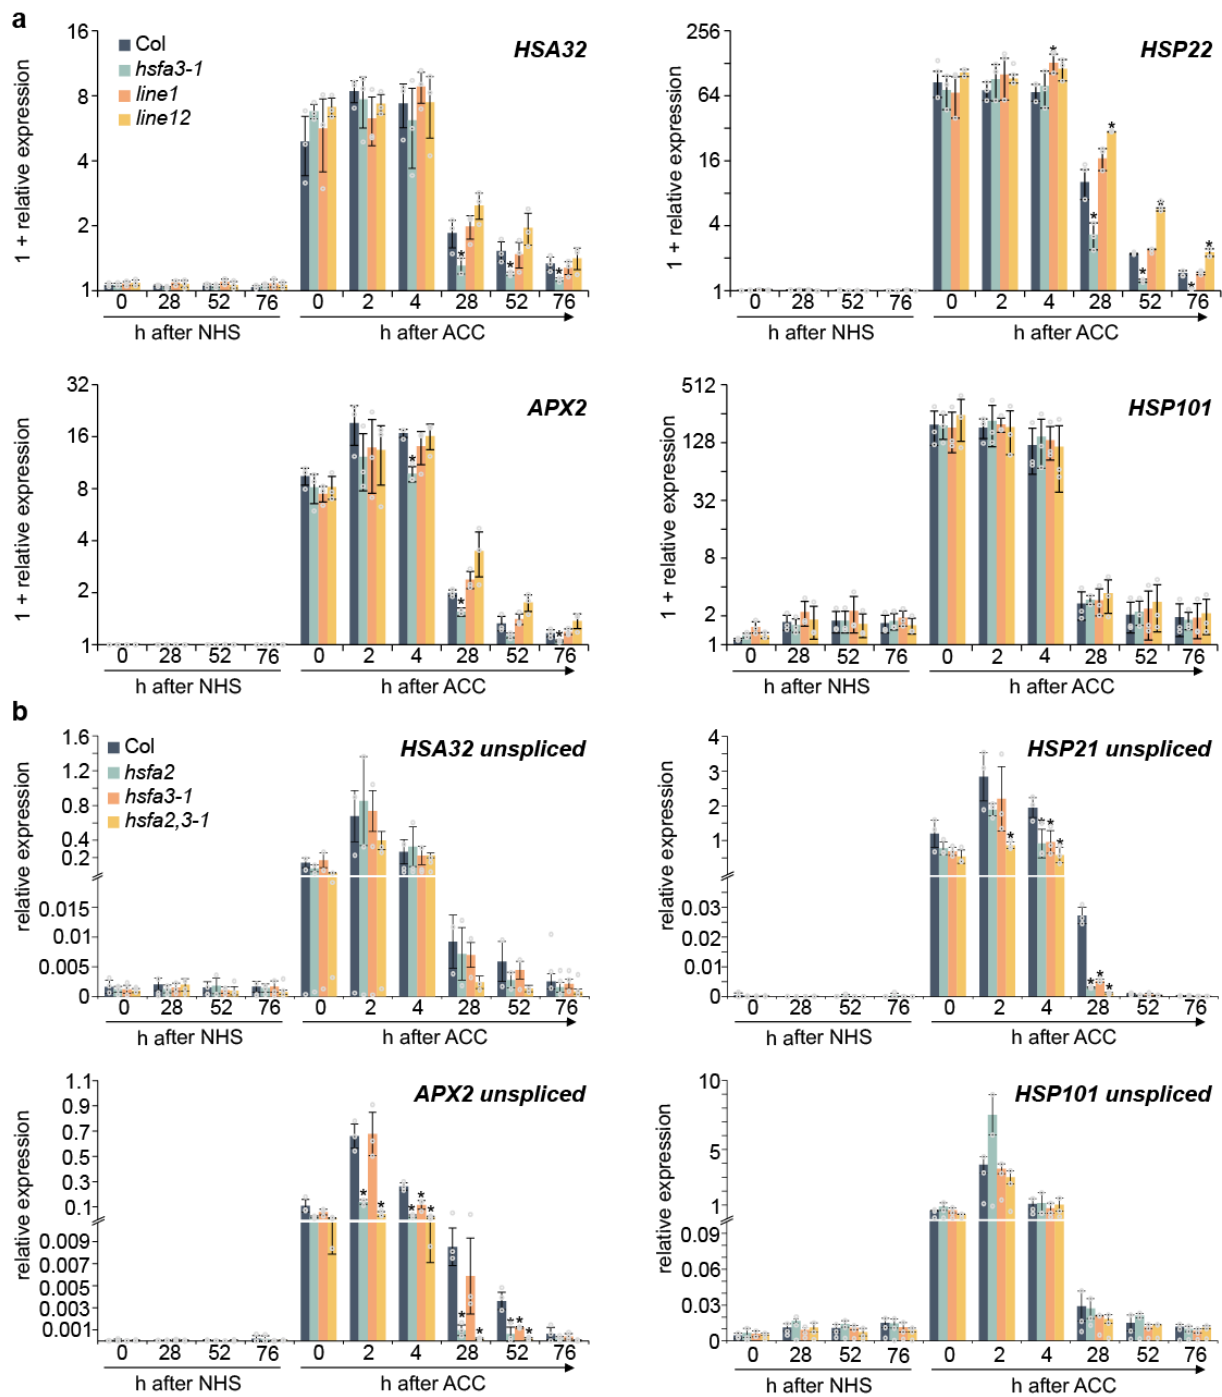

**Supplementary Fig. 5 *pHSFA3::FLAG-HSFA3* rescues the sustained induction defects of memory genes in *hsfa3-1* and sustained induction of unspliced transcripts in mutants**

**a** Relative transcript levels of the memory genes *HSA32*, *HSP22* and *APX2* and the non-memory gene *HSP101* as measured by qRT-PCR.

**b** Relative levels of unspliced transcripts of the memory genes *APX2*, *HSA32* and the non-memory gene *HSP101* as measured by qRT-PCR.

Time points depict h after ACC treatment. Data are mean  $\pm$  SD of three independent experiments. Asterisks mark significant differences to Col ( $p < 0.05$ , unpaired two-sided t-test).

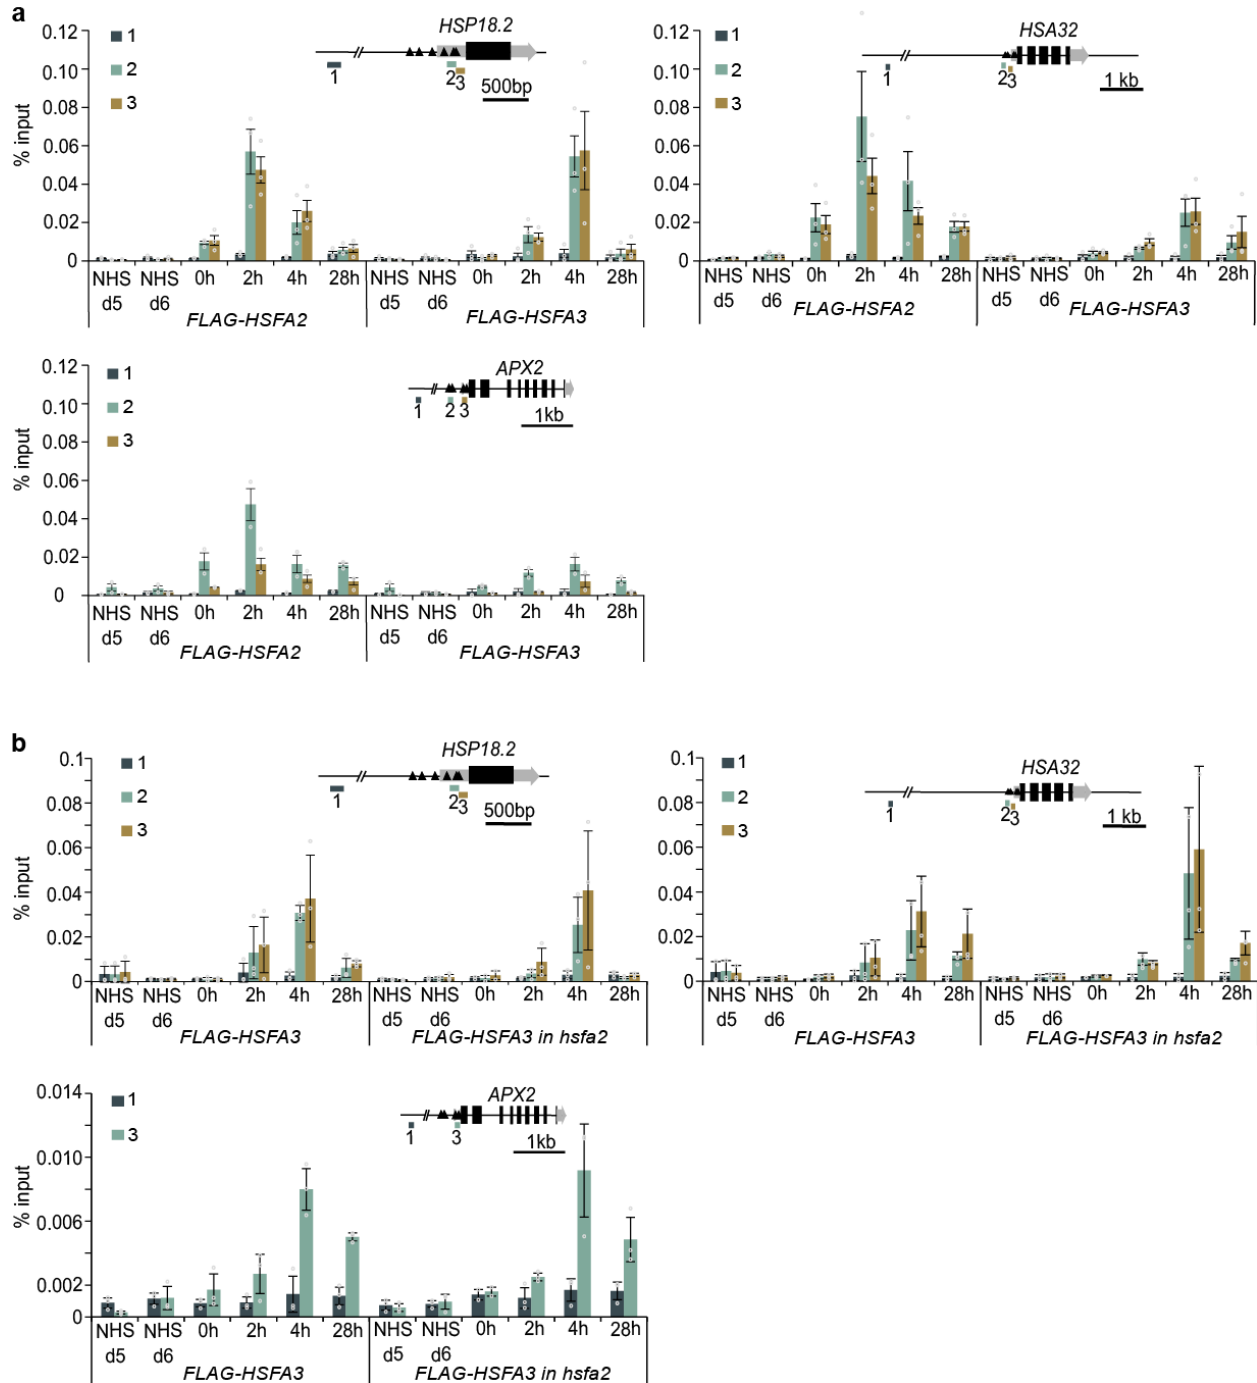

**Supplementary Fig. 6 HSFA2 and HSFA3 bind to memory gene promoters (additional target genes, cf. Fig. 8)**

**a** Occupancy of HSFA2 and HSFA3 as determined by ChIP-qPCR from *pHSFA2::FLAG-HSFA2* and *pHSFA3::FLAG-HSFA3*.

**b** Occupancy of HSFA3 as determined by ChIP-qPCR from *pHSFA3::FLAG-HSFA3* in the wild type or *hsfa2* mutant background.

Enrichment normalized to Input from three independent experiments for the HS memory genes *HSP18.2*, *HSA32*, and *APX2*. Time points are given in h after ACC treatment. Data are mean  $\pm$  SD. For each locus one control amplicon situated approximately 3 kb upstream is shown alongside the amplicon covering heat shock elements (black triangles) in the promoter (inset gene models).



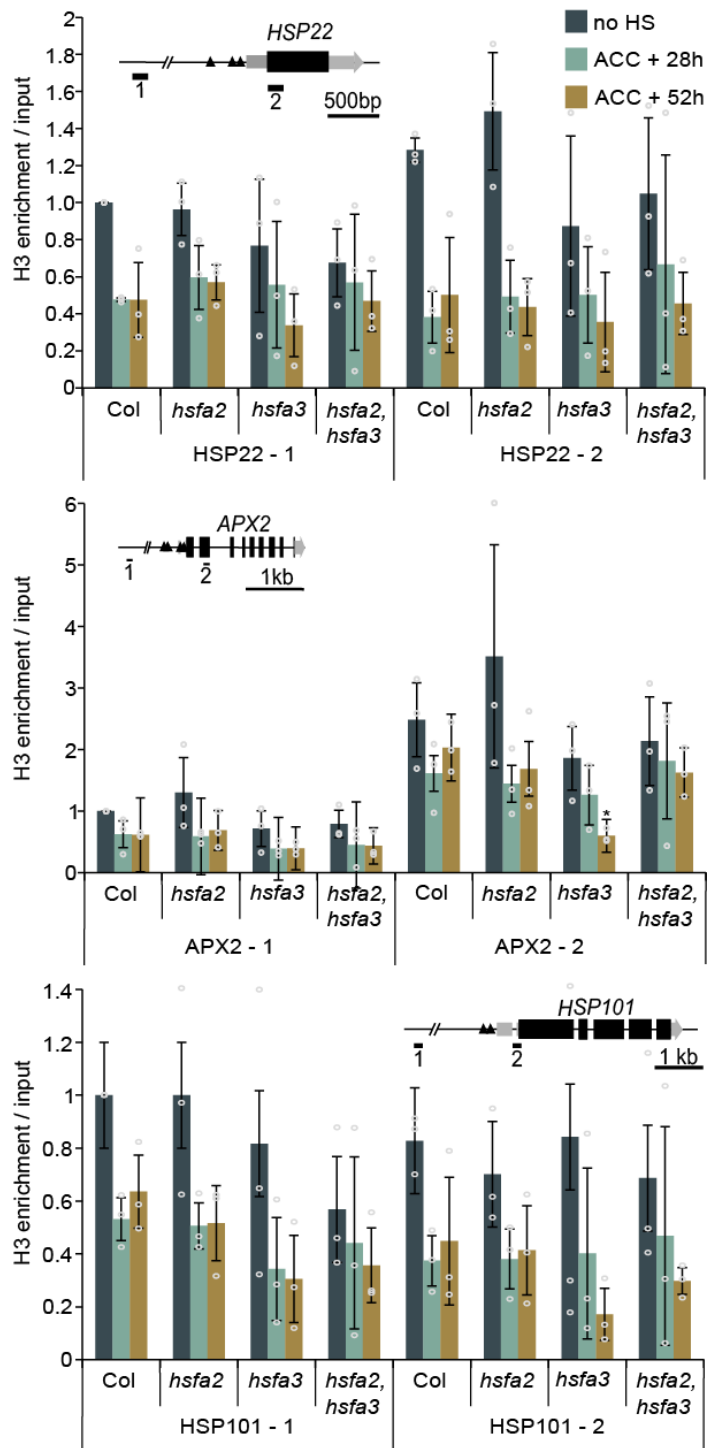

**Supplementary Fig. 7 Histone H3 enrichment after ACC (cf. Fig. 9)**

Enrichment of histone H3 relative to input for the HS memory genes *HSP22* and *APX2*, and the non-memory gene *HSP101* as determined by ChIP-qPCR from three independent experiments. Data were normalized to Col amplicon 1 for each gene. For each locus the control amplicon 1 situated approximately 3 kb upstream is shown alongside the amplicon covering the transcriptional start site (inset gene models). Time points are given in h after end of ACC treatment. Data are mean  $\pm$  SD. Asterisks mark significant differences to Col ( $p < 0.01$ , unpaired two-sided t-test).

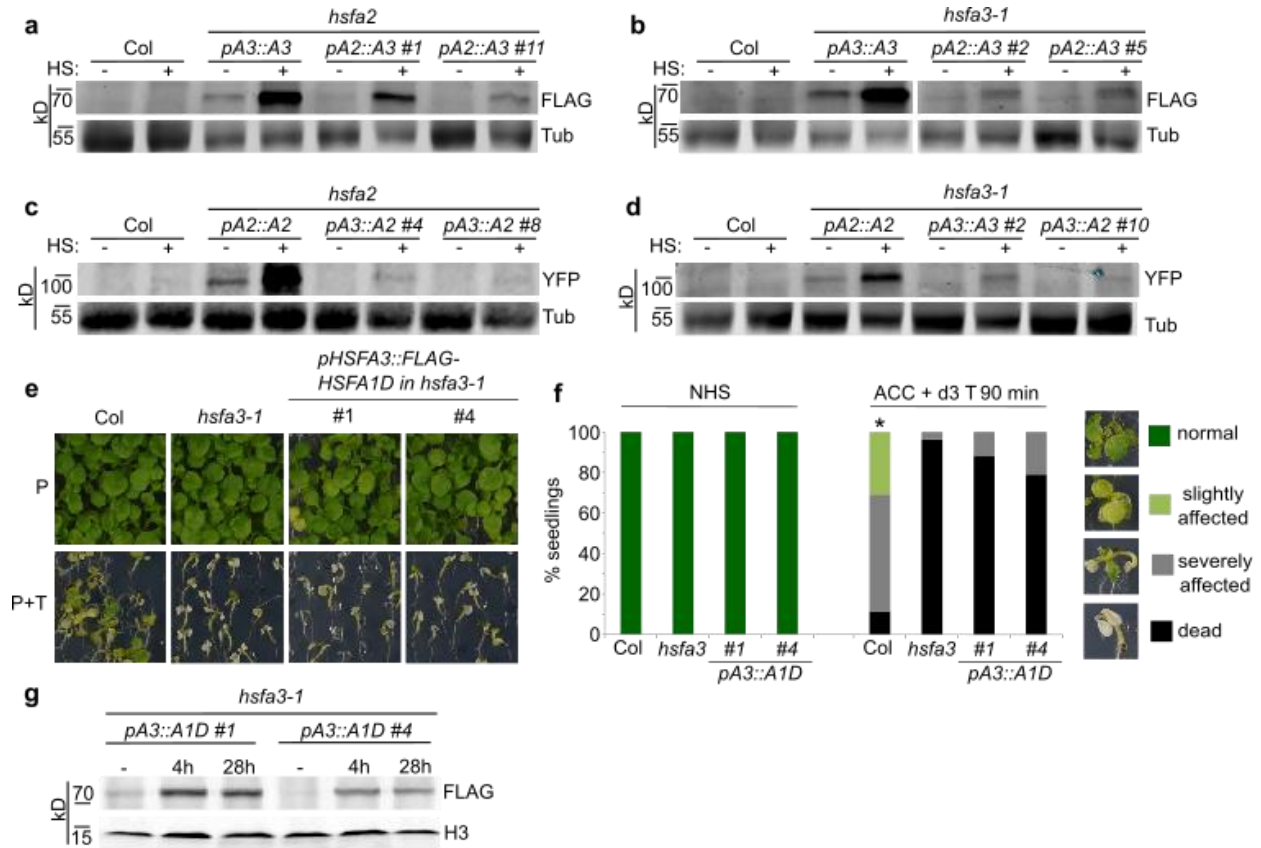

**Supplementary Fig. 8 Protein expression of promoter-swap constructs (cf. Fig. 10) and HSFA1D protein cannot functionally replace HSFA3**

**a-d** Expression of FLAG-HSFA3 or HSFA2-YFP from *pHSFA2::FLAG-HSFA3* (a-b) or *pHSFA3::HSFA2-YFP* (c-d) in *hsfa2* (a,c) or *hsfa3-1* mutants (b,d), respectively, as shown by immunoblotting with the indicated antibodies.

**e** HS memory assay for *hsfa3-1* and two independent transgenic lines expressing FLAG-HSFA1D from the *HSFA3* promoter. 4 d-old seedlings were exposed to an ACC treatment and to a triggering HS (T) at 44°C 3 d after ACC (P+T).

**f** Distribution of phenotypic categories observed in the HS memory assay shown in e. Asterisk depicts significant differences to *hsfa3-1* mutants ( $p=0.0000019$ , Fisher's exact test,  $n \geq 20$  seedlings per genotype).

**g** Protein expression of FLAG-HSFA1D from *pHSFA3::FLAG-HSFA1D* in the absence of HS treatment (-) or 4-28 h after ACC as shown by immunoblotting with the indicated antibodies.

Protein expression experiments (a, b, c, d, g) were repeated 3 times with similar results.

Supplementary Table 1: HSF- and DREB-binding motifs in *HSFA2* and *HSFA3* promoters identified by JASPAR (<http://jaspar.genereg.net/>)

| Matrix ID | Name   | Score   | Relative score | Sequence ID | Start | End | Strand | Predicted sequence |
|-----------|--------|---------|----------------|-------------|-------|-----|--------|--------------------|
| MA1665.1  | HSFB2A | 18.5785 | 0.983397096    | HSFA2       | 500   | 511 | -      | gaaggttctaga       |
| MA1667.1  | HSFC1  | 17.4454 | 0.98016547     | HSFA2       | 501   | 511 | +      | ctagaaccttc        |
| MA1667.1  | HSFC1  | 15.5783 | 0.950466801    | HSFA2       | 410   | 420 | -      | ccagaaacttc        |
| MA1665.1  | HSFB2A | 15.9492 | 0.940603946    | HSFA2       | 410   | 421 | +      | gaagttctgga        |
| MA1664.1  | HSFA6B | 18.1615 | 0.939249994    | HSFA2       | 498   | 512 | -      | agaaggttctagaga    |
| MA1666.1  | HSFB2B | 18.6039 | 0.938907035    | HSFA2       | 499   | 512 | +      | ctctagaaccttct     |
| MA1664.1  | HSFA6B | 16.6796 | 0.916784202    | HSFA2       | 409   | 423 | +      | cgaagttctggaac     |
| MA1666.1  | HSFB2B | 16.6508 | 0.91166361     | HSFA2       | 409   | 422 | -      | ttccagaaacttcg     |
| MA1665.1  | HSFB2A | 11.2508 | 0.864134403    | HSFA2       | 465   | 476 | +      | gaagctcaata        |
| MA1666.1  | HSFB2B | 12.7155 | 0.8567711      | HSFA2       | 314   | 327 | -      | ttctaggtccttct     |
| MA1664.1  | HSFA6B | 12.6872 | 0.856261914    | HSFA2       | 314   | 328 | +      | agaaggacctagaac    |
| MA0986.1  | DREB2C | 7.36964 | 0.852137169    | HSFA2       | 296   | 303 | -      | ggcgcga            |
| MA1665.1  | HSFB2A | 9.47322 | 0.835202346    | HSFA2       | 461   | 472 | -      | gaagctctttg        |
| MA1666.1  | HSFB2B | 11.1379 | 0.834766401    | HSFA2       | 415   | 428 | +      | ttctggaacattgt     |
| MA1665.1  | HSFB2A | 9.34876 | 0.83317656     | HSFA2       | 416   | 427 | -      | caatgtccaga        |
| MA1664.1  | HSFA6B | 10.6675 | 0.825645298    | HSFA2       | 414   | 428 | -      | acaatgtccagaaa     |
| MA1665.1  | HSFB2A | 8.57313 | 0.820552734    | HSFA2       | 315   | 326 | +      | gaaggacctaga       |
| MA1667.1  | HSFC1  | 7.37575 | 0.819991162    | HSFA2       | 315   | 325 | -      | ctaggtccttc        |
| MA1664.1  | HSFA6B | 9.77443 | 0.812106708    | HSFA2       | 658   | 672 | -      | gtaactttcgagaaa    |
| MA1665.1  | HSFB2A | 8.0052  | 0.811309289    | HSFA2       | 390   | 401 | +      | agagattctaga       |
| MA1667.1  | HSFC1  | 6.62239 | 0.808007658    | HSFA2       | 57    | 67  | -      | cgaggaacttc        |
| MA0986.1  | DREB2C | 5.31175 | 0.807983832    | HSFA2       | 227   | 234 | -      | gacctaca           |
| MA1666.1  | HSFB2B | 9.03637 | 0.805452774    | HSFA2       | 659   | 672 | +      | ttctgaaagttac      |
| MA1665.1  | HSFB2A | 7.642   | 0.805397953    | HSFA2       | 660   | 671 | -      | taactttcgaga       |
| MA1665.1  | HSFB2A | 7.62676 | 0.805149815    | HSFA2       | 406   | 417 | -      | gaaacttcgta        |

  

| Matrix ID | Name   | Score   | Relative score | Sequence ID | Start | End  | Strand | Predicted sequence    |
|-----------|--------|---------|----------------|-------------|-------|------|--------|-----------------------|
| MA0986.1  | DREB2C | 11.5636 | 0.942120189    | HSFA3       | 969   | 976  | -      | aaccgaca              |
| MA0986.1  | DREB2C | 11.5636 | 0.942120189    | HSFA3       | 1136  | 1143 | -      | aaccgaca              |
| MA0986.1  | DREB2C | 9.31686 | 0.893915977    | HSFA3       | 1088  | 1095 | +      | caccgcct              |
| MA1258.1  | DREB2  | 14.3269 | 0.890856893    | HSFA3       | 1081  | 1101 | -      | atagagaggcggtggaatgg  |
| MA1258.1  | DREB2  | 12.8104 | 0.868889881    | HSFA3       | 963   | 983  | +      | tttcaatgtcgggtgtacaat |
| MA1665.1  | HSFB2A | 9.90829 | 0.842283367    | HSFA3       | 995   | 1006 | +      | aaagttcctcaaa         |
| MA0986.1  | DREB2C | 5.60096 | 0.814188997    | HSFA3       | 519   | 526  | +      | aaccaaca              |
| MA1665.1  | HSFB2A | 7.68134 | 0.806038239    | HSFA3       | 608   | 619  | +      | aaaatatctaga          |

Supplementary Table 2: Unique peptide numbers of HSF-proteins identified in IP-MS experiments

Plants were exposed to either 37°C for 1h or a full ACC treatment and samples were taken at the indicated times. Unique peptide numbers from three independent experiments are shown for each genotype and condition.

| <b>HSFA2-YFP IP-MS</b> |        |            |          |          |            |          |          |                     |          |          |                  |          |          |
|------------------------|--------|------------|----------|----------|------------|----------|----------|---------------------|----------|----------|------------------|----------|----------|
|                        |        | <b>Col</b> |          |          | <b>NHS</b> |          |          | <b>37°C + 45min</b> |          |          | <b>37°C + 3h</b> |          |          |
|                        |        | <b>1</b>   | <b>2</b> | <b>3</b> | <b>1</b>   | <b>2</b> | <b>3</b> | <b>1</b>            | <b>2</b> | <b>3</b> | <b>1</b>         | <b>2</b> | <b>3</b> |
| AT2G26150              | HSFA2  | 3          | 0        | 0        | 23         | 23       | 25       | 22                  | 27       | 26       | 26               | 27       | 28       |
| AT5G03720              | HSFA3  | 0          | 0        | 0        | 1          | 0        | 2        | 2                   | 9        | 2        | 6                | 9        | 11       |
| AT4G17750              | HSFA1A | 0          | 0        | 0        | 4          | 4        | 5        | 2                   | 6        | 4        | 4                | 6        | 5        |
| AT5G16820              | HSFA1B | 0          | 0        | 0        | 4          | 5        | 5        | 5                   | 10       | 5        | 6                | 10       | 7        |
| AT1G32330              | HSFA1D | 0          | 0        | 0        | 6          | 6        | 8        | 5                   | 9        | 7        | 7                | 9        | 7        |
| AT3G22830              | HSFA6B | 0          | 0        | 0        | 1          | 1        | 3        | 0                   | 6        | 1        | 1                | 6        | 7        |
| AT3G51910              | HSFA7A | 0          | 0        | 0        | 0          | 0        | 0        | 7                   | 11       | 11       | 9                | 10       | 13       |
| AT3G63350              | HSFA7B | 0          | 0        | 0        | 0          | 0        | 0        | 0                   | 4        | 0        | 1                | 4        | 5        |

| <b>3xFLAG-HSFA3 IP-MS</b> |        |            |          |          |            |          |          |                  |          |          |                 |          |          |
|---------------------------|--------|------------|----------|----------|------------|----------|----------|------------------|----------|----------|-----------------|----------|----------|
|                           |        | <b>Col</b> |          |          | <b>NHS</b> |          |          | <b>37°C + 4h</b> |          |          | <b>ACC + 4h</b> |          |          |
|                           |        | <b>1</b>   | <b>2</b> | <b>3</b> | <b>1</b>   | <b>2</b> | <b>3</b> | <b>1</b>         | <b>2</b> | <b>3</b> | <b>1</b>        | <b>2</b> | <b>3</b> |
| AT5G03720                 | HSFA3  | 0          | 1        | 2        | 8          | 10       | 10       | 14               | 14       | 14       | 16              | 17       | 18       |
| AT2G26150                 | HSFA2  | 1          | 1        | 1        | 0          | 1        | 1        | 11               | 9        | 11       | 14              | 13       | 13       |
| AT1G32330                 | HSFA1D | 0          | 0        | 0        | 3          | 3        | 4        | 4                | 6        | 3        | 5               | 7        | 6        |
| AT5G16820                 | HSFA1B | 0          | 0        | 0        | 1          | 2        | 0        | 3                | 5        | 3        | 6               | 6        | 6        |
| AT3G22830                 | HSFA6B | 0          | 0        | 0        | 0          | 1        | 0        | 0                | 1        | 1        | 2               | 5        | 5        |
| AT3G51910                 | HSFA7A | 0          | 0        | 0        | 0          | 0        | 0        | 2                | 2        | 2        | 2               | 3        | 3        |
| AT4G17750                 | HSFA1A | 0          | 0        | 0        | 0          | 0        | 0        | 0                | 0        | 0        | 1               | 1        | 1        |



Supplementary Table 3: Unique peptide numbers of HSF-proteins identified by Co-IP/MS experiments of 3xFLAG-HSFA2, 3xFLAG-HSFA3 in wild type and *hsfa* mutant backgrounds

Plants were exposed to ACC treatment and harvested 4 h after the end of the treatment. Protein complexes were purified with anti-FLAG in all samples. The number of unique peptides is displayed for five independent biological replicates per genotype x treatment.

|           | 3xFLAG-HSFA2 |   |   |   |   | 3xFLAG-HSFA2 in <i>hsfa3</i> |    |   |    |    | Col |   |   |   |   |         |   |    |    |   |   |   |   |   |   |   |   |   |   |   |
|-----------|--------------|---|---|---|---|------------------------------|----|---|----|----|-----|---|---|---|---|---------|---|----|----|---|---|---|---|---|---|---|---|---|---|---|
|           | NHS          |   |   |   |   | ACC +4h                      |    |   |    |    | NHS |   |   |   |   | ACC +4h |   |    |    |   |   |   |   |   |   |   |   |   |   |   |
| replicate | 1            | 2 | 3 | 4 | 5 | 1                            | 2  | 3 | 4  | 5  | 1   | 2 | 3 | 4 | 5 | 1       | 2 | 3  | 4  | 5 | 1 | 2 | 3 | 4 | 5 |   |   |   |   |   |
| HSFA3     | -            | - | - | - | 7 | -                            | 3  | 2 | 4  | 3  | -   | - | - | - | - | -       | - | -  | 2  | - | - | - | - | 1 | - | - | - | - | - | - |
| HSFA2     | -            | 1 | 2 | 6 | 1 | 5                            | 13 | 9 | 14 | 10 | 1   | - | 1 | - | - | 14      | 6 | 19 | 20 | 6 | - | - | 1 | 1 | - | 1 | 1 | 1 | - | - |
| HSFA1D    | -            | - | - | 1 | 2 | -                            | 1  | 1 | 1  | 1  | -   | - | - | - | - | 3       | 2 | 5  | 8  | - | - | - | - | - | - | - | - | - | - | - |
| HSFA1B    | -            | - | - | - | - | -                            | 3  | - | 3  | 1  | -   | - | - | - | - | 4       | 3 | 5  | 6  | 2 | - | - | - | 1 | - | - | - | - | - | - |
| HSFA1A    | -            | - | - | - | 1 | -                            | -  | - | -  | -  | -   | - | - | - | - | -       | - | -  | 4  | - | - | - | - | - | - | 1 | - | - | - | - |
| HSFA7B    | -            | - | - | - | - | -                            | -  | - | 1  | -  | -   | - | - | - | - | -       | - | 3  | 3  | - | - | - | - | - | - | - | - | - | - | - |
| HSFA7A    | -            | - | - | - | - | -                            | -  | - | -  | -  | -   | - | - | - | - | -       | - | -  | -  | - | - | - | - | - | - | - | - | - | - | - |
| HSFA6B    | -            | - | - | - | - | -                            | -  | - | -  | -  | -   | - | - | - | - | -       | - | -  | -  | - | - | - | - | - | - | - | - | - | - | - |

|           | 3xFLAG-HSFA3 |   |   |   |    | 3xFLAG-HSFA3 in <i>hsfa2</i> |    |   |    |    |     |   |   |    |   |         |   |   |    |   |   |   |   |   |   |
|-----------|--------------|---|---|---|----|------------------------------|----|---|----|----|-----|---|---|----|---|---------|---|---|----|---|---|---|---|---|---|
|           | NHS          |   |   |   |    | ACC +4h                      |    |   |    |    | NHS |   |   |    |   | ACC +4h |   |   |    |   |   |   |   |   |   |
| replicate | 1            | 2 | 3 | 4 | 5  | 1                            | 2  | 3 | 4  | 5  | 1   | 2 | 3 | 4  | 5 | 1       | 2 | 3 | 4  | 5 | 1 | 2 | 3 | 4 | 5 |
| HSFA3     | 6            | 2 | 4 | 4 | 11 | 18                           | 19 | 5 | 20 | 18 | 11  | 4 | 5 | 12 | 1 | 20      | 7 | 9 | 20 | 9 |   |   |   |   |   |
| HSFA2     | -            | 1 | - | 2 | 1  | 12                           | 16 | 4 | 18 | 16 | -   | - | 1 | 1  | 4 | -       | - | - | 1  | - |   |   |   |   |   |
| HSFA1D    | 1            | - | 1 | 1 | 5  | 4                            | 8  | - | 8  | 6  | 2   | 2 | 1 | 4  | 1 | 6       | 1 | 3 | 8  | 1 |   |   |   |   |   |
| HSFA1B    | 1            | - | - | - | -  | 3                            | 5  | 1 | 6  | 5  | 1   | 1 | - | 2  | - | 5       | 3 | 4 | 6  | 2 |   |   |   |   |   |
| HSFA1A    | 1            | - | - | - | 1  | -                            | 2  | - | 2  | 1  | 1   | - | - | 1  | - | 4       | - | - | 4  | - |   |   |   |   |   |
| HSFA7B    | -            | - | - | - | -  | -                            | -  | - | -  | -  | -   | - | - | -  | - | -       | - | - | -  | - |   |   |   |   |   |
| HSFA7A    | -            | - | - | - | -  | -                            | -  | - | -  | -  | -   | - | - | -  | - | -       | - | - | -  | - |   |   |   |   |   |
| HSFA6B    | -            | - | - | - | -  | -                            | -  | - | -  | -  | -   | - | - | -  | - | -       | - | - | -  | - |   |   |   |   |   |



| Name                              | Sequence                                                | purpose         |
|-----------------------------------|---------------------------------------------------------|-----------------|
| attB1_F1                          | TTTCAAATAC                                              |                 |
| 4115 / pHALO-HsfA1a-attB2_R1      | GGGGACCACCTTTGTACAAGAAAGCTGGGTTCTAGTGTCTGT<br>TTCTGATG  | HSFA1a          |
| 4116 / pHALO-HsfA1b-attB1_F1      | GGGGACAAGTTTGTACAAAAAAGCAGGCTTAATGGAATCGGT<br>TCCCGAATC | HSFA1b          |
| 4117 / pHALO-HsfA1b-attB2_R1      | GGGGACCACCTTTGTACAAGAAAGCTGGGTTTTATTTCTCTG<br>TGCTTCTG  |                 |
| 4118 / pHALO-HsfA1d-attB1_F1      | GGGGACAAGTTTGTACAAAAAAGCAGGCTTAatggATGTGAGC<br>AAAGTAAC | HSFA1d          |
| 4119 / pHALO-HsfA1d-attB2_R1      | GGGGACCACCTTTGTACAAGAAAGCTGGGTTTTACCTTGAGAG<br>ATCTAAG  |                 |
| 4120 / pHALO-HsfA2-attB1_F1       | GGGGACAAGTTTGTACAAAAAAGCAGGCTTAATGGAAGAACT<br>GAAAGTG   | HSFA2           |
| 4121 / pHALO-HsfA2-attB2_R1       | GGGGACCACCTTTGTACAAGAAAGCTGGGTTTTAAGGTTCCGA<br>ACCAAG   |                 |
| 4122 / pHALO-HsfA3-attB1_F1       | GGGGACAAGTTTGTACAAAAAAGCAGGCTTAATGAGCCCAAA<br>AAAAGATG  | HSFA3           |
| 4123 / pHALO-HsfA3-attB2_R1       | GGGGACCACCTTTGTACAAGAAAGCTGGGTTCTAAGGATCATT<br>CATTGG   |                 |
| 4124 / pHALO-HsfA7a-attB1_F1      | GGGGACAAGTTTGTACAAAAAAGCAGGCTTAATGATGAACCC<br>GTTTCTC   | HSFA7a          |
| 4125 / pHALO-HsfA7a-attB2_R1      | GGGGACCACCTTTGTACAAGAAAGCTGGGTTTTAGGAGGTGG<br>AAGCCAAAC |                 |
| <b>qPCR (Gene expression)</b>     |                                                         |                 |
| 1547/F-AT4G26410                  | GAGCTGAAGTGGCTTCAATGAC                                  | AT4G26410       |
| 1548/R-AT4G26410                  | GGTCCGACATACCCATGATCC                                   | Reference gene  |
| 352/LP-Hsa32                      | CTGATGCGAAGTTGGTTGAG                                    | HSA32           |
| 353/RP_Hsa32                      | GCACATAACATCAGACACATACGA                                |                 |
| 637/HSP22 REV                     | TTCAGGAGATAGTTTTCGTGAGGTTA                              | HSP22           |
| 638/HSP22 FOR                     | ATTCTGGAGACAGTTCAAGCTACCT                               |                 |
| 359/HSP18.2_qPCR_F                | ACAAACGCAAGAGTGGATTGGA                                  | HSP18.2         |
| 360/HSP18.2_qPCR_R                | GCTCCTCTCTCCGCTAATCTGC                                  |                 |
| 363/HSP21_qPCR_F                  | TGGACGTCTCTCCTTTTCGGATTGT                               | HSP21           |
| 364/HSP21_qPCR_R                  | TGCACGAATCTCTGACACTCCA                                  |                 |
| 267/HSP101F                       | ATGACCCGGTGTATGGTGCTAG                                  | HSP101          |
| 268/HSP101R                       | CGCCTGCATCTATGTAACAGTG                                  |                 |
| 265/HSP70F                        | CCGTCTTCGATGCTAAGCGTCT                                  | HSP70           |
| 266/HSP70R                        | AACCACAATCATAGGCTTCTCACC                                |                 |
| 633/APX2 REV                      | ACTCCTTGTCAGCAAACCCGAG                                  | APX2            |
| 634/APX2 FOR                      | CTTGATGATCCTCTCTTTCTCCCA                                |                 |
| 2920/Mips2_qRTPCR-r               | AGCCAATAGATTCTCCGTCGTATC                                | MIPS2           |
| 2921/Mips2_qRTPCR-f               | AAGGACATGAGGGGAGTTTAAGG                                 |                 |
| 2947/HSFa1E_R                     | TTCGCCGTCGCTACAGATTC                                    | HSFA1E          |
| 2948/HSFa1E_F                     | CGAATATAAATCTCTGTAAGGTTTGCG                             |                 |
| 4150/LACS9-F                      | CACGAAAGAGCAAGCCGTGAAAG                                 | LACS9           |
| 4151/LACS9-R                      | ATCGTGATTGTTTAGCCGCCTTC                                 |                 |
| 4156/LPAT5-F                      | AGGGCACAGATTACACAGAGGCTA                                | LPAT5           |
| 4157/LPAT5-R                      | AAGTGAGCAACTCAGTTCTTGCAAGC                              |                 |
| 4158/TPR1-F                       | ACGACGGATCAAACAAGGAGAAAGC                               | TPR1            |
| 4159/TPR1-R                       | TATGGATCGAAGCTCTATAGACTCAGG                             |                 |
| 4160/Myb86-F                      | TCTGTCCCTAAACTCGCAGGTTTGCA                              | MYB86           |
| 4161/Myb86-R                      | AATGATCAAGCTTTCTTCGTTGAGAG                              |                 |
| 4154/DGS1-F                       | GAGCAACCGACGAGTGGGATTTAG                                | DGS1            |
| 4155/DGS1-R                       | TTTGCTGCTGTGGCCTTCCCTAAC                                |                 |
| 315/Hsa32uspl_F                   | TATGCTTACTGTGAGAATGCCTTTGT                              | HSA32 unspliced |
| 653/HSA32-3UTR                    | Ttcttacagcatcaagaagca                                   |                 |
| 2302/Hsp21_unspliced_transcript_F | TTAATCTAACCACAGGATTGTTGGATC                             | HSP21 unspliced |

| Name                                    | Sequence                    | purpose          |
|-----------------------------------------|-----------------------------|------------------|
| 364/HSP21_qPCR_R                        | TGCACGAATCTCTGACACTCCACT    |                  |
| 634/APX2 FOR                            | CTTGATGATCCTCTCTTTCTCCCA    | APX2 unspliced   |
| 2210/APX2_unspl_R                       | AGAAGGCATCCTCCTCCTGAGAG     |                  |
| 2725/HSP101_unsp_F                      | CTGACTCTTGTGGTTGCTTTCT      | HSP101 unspliced |
| 268/HSP101R                             | CGCCTGCATCTATGTAACAGTG      |                  |
| <b>qPCR (transcription factor-ChIP)</b> |                             |                  |
| 1259/HSP22-3kb_FWD                      | CGTTGGACTTGGCCTTAGAT        | HSP22-1          |
| 1260/HSP22-3kb_REV                      | TGACTGCTCCCTGATTCTTG        |                  |
| 688/HSP22-200bp-f                       | GACTCATCACAAACAGAATTGGTC    | HSP22-2          |
| 689/HSP22-200bp-r                       | TGTTGTGCCTTTAAGGGTCTTC      |                  |
| 1921/HSP22_TSS-60-f                     | CACAACAAACTTATCCAACG        | HSP22-3          |
| 1922/HSP22_TSS-60-r                     | GGTAGAGTTTTGCAGAGAGA        |                  |
| 2225/Mu1Cf                              | TTCTTCTCCATCGACTCTCTC       | Mu1C             |
| 2062/MU1Crev                            | ATGATGATCCAACGACCAACCAC     |                  |
| 2518/HSP101 -3,2kb-f                    | CTCTCAAAAAGTGACCTCCA        | HSP101-1         |
| 2519/HSP101 -3,2kb-r                    | GAGCTCCAAGAAAAGGCCAT        |                  |
| 2669/HSP101 -348bp-f                    | CGTAAATCTTTGGATTTTGA        | HSP101-2         |
| 2670/HSP101 -348bp-r                    | TTTCTCCTCTTTTGCCGCAT        |                  |
| 2671/HSP101 -136bp-f                    | ACATCTACCTGTCCGATCAA        | HSP101-3         |
| 2672/HSP101 -136bp-r                    | TCTGGAAAGATAGAGAACTA        |                  |
| 1255/HSP18.2 -3kb_f                     | GCCCCTAGGGATTTGACTA         | HSP18.2-1        |
| 1256/HSP18.2 -3kb_r                     | CCCGTAAATAAAGCGGTCAA        |                  |
| 1938/HSP18.2 -262bp-f                   | AGGATAATACAACAACAAG         | HSP18.2-2        |
| 1939/HSP18.2 -262bp-r                   | CACTGTGGTGAAATGACCAG        |                  |
| 1940/HSP18.2 -125bp-f                   | TATGTGTTCTAAAGACTCCA        | HSP18.2-3        |
| 1941/HSP18.2 -125bp-r                   | GTTAGAGGATGAAGAGAGAA        |                  |
| 2324/HSA32 -5kb_F                       | TGGGTGTGTCCATTTACGTC        | HSA32-1          |
| 2325/HSA32 -5kb_R                       | TGTAGGTATCGATGTTGGAG        |                  |
| 694/HSA32 -200bp_f                      | CATCAACGAGACGGGATTTAG       | HSA32-2          |
| 695/HSA32 -200bp_r                      | GATTCTTGACAGAGCAGCCAAG      |                  |
| 1907/HSA32 -75bp_F                      | TATCCTAAATCCCGTCTCGTT       | HSA32-3          |
| 1908/HSA32 -75bp_R                      | ATGTCCAAGTCGAAGAATGG        |                  |
| 1857/APX2 -3.2kb_F                      | GGATATCAAACCCAACTTGAAGAGAG  | APX2-1           |
| 1858/APX2 -3.2kb_R                      | ATAATCTGAGCAAAAGATAAAACACGG |                  |
| 1239/APX2 HRE1-F                        | ACGTGGTGTGTATCTGTTGGA       | APX2-2           |
| 1240/APX2 HRE1-R                        | AGTCTTCTTTTGGAGATGGACGGT    |                  |
| 1854/APX2 +40bp_F                       | TCGATAGGTTCTCCATTCTTTAGG    | APX2-3           |
| 1855/APX2 +40bp_R                       | TTCCTCTGCATCTCTGAACAGC      |                  |
| <b>qPCR (H3K4me3-ChIP)</b>              |                             |                  |
| 1259/HSP22-3kb_FWD                      | CGTTGGACTTGGCCTTAGAT        | HSP22-1          |
| 1260/HSP22-3kb_REV                      | TGACTGCTCCCTGATTCTTG        |                  |
| 675/4g10250R_ATG_chip/hsp22             | AGTCCTAATGGGATTCTCTCCA      | HSP22-2          |
| 676/4g10250F_ATG+50_chip/hsp22          | GTTGCTTGAAACATCAAAACAAG     |                  |
| 2518/HSP101 -3,2kb_F                    | CTCTCAAAAAGTGACCTCCA        | HSP101-1         |
| 2519/HSP101 -3,2kb_R                    | GAGCTCCAAGAAAAGGCCAT        |                  |
| 2675/HSP101 +112bp_F                    | TCTGCTTGATTCTCTGCAA         | HSP101-2         |
| 2676/HSP101 +112bp_R                    | ACACACAAATGAGAACAAGA        |                  |
| 1857/APX2 -3.2kb_F                      | GGATATCAAACCCAACTTGAAGAGAG  | APX2-1           |
| 1858/APX2 -3.2kb_R                      | ATAATCTGAGCAAAAGATAAAACACGG |                  |
| 1869/APX2 +510bp_F                      | CTGTTCCCTATTCTGTATATGCTG    | APX2-2           |
| 1870/APX2 +510bp_R                      | ACCCTTGATTCTATGGTTCTACCTC   |                  |
| 698/HSA32 +514bp_f                      | TGCTTCGTAGTGGTCCTCAG        | HSA32-1          |



| <b>Name</b>        | <b>Sequence</b>       | <b>purpose</b> |
|--------------------|-----------------------|----------------|
| 699/HSA32 +514bp_r | CCCAACTGCTTACACTCCTGC |                |
| 800/HSA32 +838bp_f | AACACCGTTCAGCCTTTCTG  | HSA32-2        |
| 801/HSA32 +838bp_r | CTCGGTCAAGCGTAAGAAG   |                |
