# Supplementary material for: Heteromeric HSFA2/HSFA3 complexes drive transcriptional memory after heat stress in Arabidopsis
Source: PubMed Central journal article supplement (PMC8187452; doi:10.1038/s41467-021-23786-6), 2021-06-08
Supplement: 41467_2021_23786_MOESM2_ESM.pdf [file 41467_2021_23786_MOESM2_ESM.pdf]

Descriptions of Additional Supplementary Files

**Supplementary data 1**

**Description:** Log<sub>2</sub> fold change relative to no-HS expression of 1-0-0 up (Col) and 1-1-1 up (Col) genes in Col, hsfA2, hsfA3-1, hsfA2 hsfA3-1.
